# Supplementary material for: Fresh-Water Mollusks as Biomonitors for Ecotoxicity of Nanomaterials
Source: MDPI journal article supplement (doi:10.3390/nano11040944), 2021-04-08
Supplement: s1 [file s1]

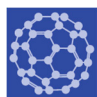

## Fresh-water mollusks as biomonitors for ecotoxicity of nano-materials

Table S1. Characterization of tested NPs samples (TEM data and microdiffraction)

| Samples                                | TEM data                                                                            | Samples | TEM data                                                                              |
|----------------------------------------|-------------------------------------------------------------------------------------|---------|---------------------------------------------------------------------------------------|
| $\text{Si}_n\text{-(C}_4\text{F}_9)_m$ | 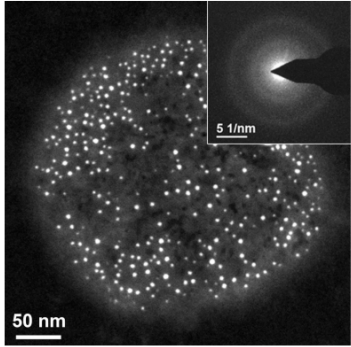   | Ag NPs  |    |
| $\text{Si}_n\text{-(C}_4\text{H}_9)_m$ |   | Cu NPs  |   |
| $\text{Si}_n\text{-(CH}_2)_m$          |  | Cu@Ag   |  |
